# Supplementary material for: Concepts and Outcomes of Perioperative Therapy in Stage IA-III Pancreatic Cancer—A Cross-Validation of the National Cancer Database (NCDB) and the German Cancer Registry Group of the Society of German Tumor Centers (GCRG/ADT)
Source: MDPI journal article supplement (doi:10.3390/cancers14040868), 2022-02-09
Supplement: s1 [file s1]

**Table S1.** Baseline Parameters and Perioperative Therapy Cohorts GCRG/ADT registry.

| Parameter                  | Condition | Total       |            | OP Upfront  |            | neoadj. Therapy + OP |            | OP + Adjuvant Therapy |            | neoadj. Therapy + OP + Adjuvant Therapy |            | p            |
|----------------------------|-----------|-------------|------------|-------------|------------|----------------------|------------|-----------------------|------------|-----------------------------------------|------------|--------------|
|                            |           | n or Median | %/Range/SE | n or Median | %/Range/SE | n or Median          | %/Range/SE | n or Median           | %/Range/SE | n or Median                             | %/Range/SE |              |
|                            | <b>n</b>  | 1611        |            | 644 (40.0%) |            | 100 (6.2%)           |            | 765 (47.5%)           |            | 102 (6.3%)                              |            | -            |
| <b>Baseline Parameters</b> |           |             |            |             |            |                      |            |                       |            |                                         |            |              |
| <b>Age</b>                 |           | 69          | 23-86      | 69          | 0.42       | 63                   | 0.91       | 67                    | 0.32       | 62                                      | 0.92%      | <b>0.002</b> |
| <b>Sex</b>                 | male      | 835         | 51.8%      | 325         | 50.5%      | 51                   | 51.0%      | 412                   | 53.9%      | 47                                      | 46.1%      | 0.374        |
|                            | female    | 776         | 48.2%      | 319         | 49.5%      | 49                   | 49.0%      | 353                   | 46.1%      | 55                                      | 53.9%      |              |
| <b>ECOG</b>                | 0-1       | 854         | 53.0%      | 415         | 64.4%      | 49                   | 49.0%      | 342                   | 44.7%      | 48                                      | 47.4%      | 0.198        |
|                            | 2-4       | 757         | 47.0%      | 229         | 35.6%      | 51                   | 51.0%      | 423                   | 55.3%      | 54                                      | 52.6%      |              |
| <b>Clinical Staging</b>    | Stage IA  | 129         | 8.0%       | 64          | 10%        | 0                    | 0.0%       | 63                    | 8.2%       | 2                                       | 2.0%       | <b>0.001</b> |
|                            | Stage IB  | 334         | 20.7%      | 144         | 22%        | 4                    | 4.0%       | 175                   | 22.9%      | 11                                      | 10.8%      |              |
| <b>UICC</b>                | Stage IIA | 310         | 19.2%      | 136         | 21%        | 20                   | 20.0%      | 144                   | 18.8%      | 10                                      | 9.8%       |              |
|                            | Stage IIB | 594         | 36.9%      | 238         | 37%        | 20                   | 20.0%      | 309                   | 40.4%      | 27                                      | 26.5%      |              |
|                            | Stage III | 244         | 15.1%      | 62          | 10%        | 56                   | 56%        | 74                    | 9.7%       | 52                                      | 51.0%      |              |

OP: operation; neoadj.: neoadjuvant; adj.: adjuvant.

**Table S2.** Baseline Parameters and Neoadjuvant Therapy Subgroups GCRG/ADT registry.

| Parameter       |                  | neoadj. Chemotherapy + OP |            | neoadj. Radiochemotherapy + OP |            | p     |
|-----------------|------------------|---------------------------|------------|--------------------------------|------------|-------|
|                 |                  | n/Median                  | %/Range/SE | n/Median                       | %/Range/SE |       |
| <b>n</b>        | <b>Condition</b> |                           | 134        |                                | 68         |       |
| <b>Age</b>      |                  | 63                        | 0.82       | 62                             | 0.81       | 0.876 |
| <b>Sex</b>      | male             | 56                        | 44.0%      | 39                             | 47.4%      | 0.277 |
|                 | female           | 75                        | 46.0%      | 29                             | 42.6%      |       |
| <b>ECOG</b>     | 0-1              | 62                        | 46.5%      | 29                             | 42.9%      | 0.389 |
|                 | 2-3              | 72                        | 53.5%      | 39                             | 47.1%      |       |
| <b>Clinical</b> | Stage IA         | 2                         | 1.5%       | 0                              | 0.0%       | 0.441 |
| <b>Staging</b>  | Stage IB         | 10                        | 7.5%       | 5                              | 7.4%       |       |
| <b>UICC</b>     | Stage IIA        | 22                        | 16.4%      | 8                              | 11.8%      |       |
|                 | Stage IIB        | 34                        | 25.4%      | 13                             | 19.1%      |       |
|                 | Stage III        | 66                        | 49.3%      | 42                             | 61.8%      |       |

OP: operation; neoadj.: neoadjuvant.

**Table S3.** Baseline Parameters and Perioperative Therapy Cohorts NCDB registry.

| Parameter                              | Condition   | Total |        | OP Upfront   |        | neoadj. Therapy + OP |        | OP + Adjuvant Therapy |        | neoadj. Therapy + OP + Adjuvant Therapy |        | p            |
|----------------------------------------|-------------|-------|--------|--------------|--------|----------------------|--------|-----------------------|--------|-----------------------------------------|--------|--------------|
|                                        |             | n     | %      | n            | %      | n                    | %      | n                     | %      | n                                       | %      |              |
| <b>n</b>                               |             | 29081 |        | 7667 (26.4%) |        | 4172 (14.3%)         |        | 16665 (47.3%)         |        | 577 (2.0%)                              |        | -            |
| <b>Baseline Parameters</b>             |             |       |        |              |        |                      |        |                       |        |                                         |        |              |
| <b>Age</b>                             |             | 67    | 21-90  | 69           | 0.12   | 64                   | 0.15   | 65                    | 0.08   | 64                                      | 0.4    | <b>0.001</b> |
| <b>Sex</b>                             | male        | 14757 | 50.70% | 3745         | 48.80% | 2093                 | 50.20% | 8601                  | 51.60% | 318                                     | 55.10% | <b>0.001</b> |
|                                        | female      | 14324 | 49.30% | 3922         | 51.20% | 2079                 | 49.80% | 8064                  | 48.40% | 259                                     | 44.90% |              |
| <b>Charlson-Deyo Comorbidity Score</b> | 0           | 19210 | 66.10% | 4828         | 63.00% | 2819                 | 67.60% | 11158                 | 67.00% | 404                                     | 70.00% | <b>0.001</b> |
|                                        | 1 or higher | 9871  | 33.90% | 2839         | 37.00% | 1353                 | 32.40% | 5506                  | 33.00% | 173                                     | 30.00% |              |
| <b>Clinical Staging</b>                | Stage IA    | 4080  | 14.0%  | 1361         | 17.8%  | 226                  | 5.5%   | 2456                  | 14.7%  | 37                                      | 6.4%   | <b>0.001</b> |
|                                        | Stage IB    | 8212  | 28.2%  | 2360         | 30.8%  | 738                  | 17.7%  | 4976                  | 29.9%  | 139                                     | 23.9%  |              |
| <b>UICC</b>                            | Stage IIA   | 7406  | 25.5%  | 1869         | 24.4%  | 1409                 | 33.8%  | 3944                  | 23.7%  | 184                                     | 31.9%  |              |
|                                        | Stage IIB   | 7971  | 27.4%  | 1923         | 25.1%  | 1039                 | 24.9%  | 4844                  | 29.2%  | 165                                     | 28.6%  |              |
|                                        | Stage III   | 1412  | 4.9%   | 154          | 2.1%   | 760                  | 18.2%  | 445                   | 2.5%   | 53                                      | 9.2%   |              |

OP: operation; neoadj.: neoadjuvant; adj.: adjuvant.

**Table S4.** Baseline Parameters and Neoadjuvant Therapy Subgroups NCDB registry.

| Parameter                              | Condition   | neoadj. Chemotherapy + OP |        | neoadj. Radiochemotherapy + OP |        | p            |
|----------------------------------------|-------------|---------------------------|--------|--------------------------------|--------|--------------|
|                                        |             | n                         | %      | n                              | %      |              |
| <b>n</b>                               |             | 1285                      |        | 2887                           |        |              |
| <b>Age</b>                             |             | 64                        | 0.29   | 63                             | 0.18   | <b>0.018</b> |
| <b>Sex</b>                             | male        | 636                       | 49.50% | 1457                           | 50.50% | 0.569        |
|                                        | female      | 649                       | 50.50% | 1430                           | 49.50% |              |
| <b>Charlson-Deyo Comorbidity Score</b> | 0           | 894                       | 69.60% | 1925                           | 66.70% | <b>0.068</b> |
|                                        | 1 or higher | 391                       | 30.40% | 962                            | 33.30% |              |
| <b>Clinical Staging</b>                | Stage IA    | 86                        | 8.7%   | 140                            | 4.9%   | <b>0.001</b> |
| <b>UICC</b>                            | Stage IB    | 261                       | 20.3%  | 477                            | 16.5%  |              |
|                                        | Stage IIA   | 422                       | 32.8%  | 987                            | 34.2%  |              |
|                                        | Stage IIB   | 335                       | 26.1%  | 704                            | 24.4%  |              |
|                                        | Stage III   | 181                       | 14.1%  | 579                            | 20.1%  |              |

OP: operation; neoadj.: neoadjuvant.

**Table S5.** Neoadjuvant Therapy and Histopathological Parameters GCRG/ADT Registry.

| Condition      |    | Total |       | OP Upfront   |       | neoadj. Therapy + OP |       | p      |
|----------------|----|-------|-------|--------------|-------|----------------------|-------|--------|
|                |    | n     | %     | n            | %     | n                    | %     |        |
| n              |    | 1392  |       | 1200 (86.2%) |       | 192 (13.8%)          |       | -      |
| Histopathology |    |       |       |              |       |                      |       |        |
| pT stage       | T0 | 17    | 1.2%  | 2            | 0.2%  | 16                   | 8.4%  | <0.001 |
|                | T1 | 62    | 4.5%  | 49           | 4.1%  | 15                   | 7.8%  |        |
|                | T2 | 294   | 21.1% | 251          | 20.9% | 44                   | 22.8% |        |
|                | T3 | 966   | 69.4% | 861          | 71.8% | 101                  | 52.7% |        |
|                | T4 | 53    | 3.8%  | 37           | 3.1%  | 16                   | 8.4%  |        |
| pN stage       | N0 | 508   | 36.5% | 414          | 34.5% | 94                   | 49.2% | 0.001  |
|                | N1 | 785   | 56.4% | 698          | 58.2% | 86                   | 44.7% |        |
|                | N2 | 99    | 7.1%  | 88           | 7.3%  | 12                   | 6.1%  |        |
| R Stage        | R0 | 988   | 71.0% | 851          | 70.9% | 138                  | 71.9% | 0.859  |
|                | R+ | 404   | 29.0% | 349          | 29.1% | 54                   | 28.1% |        |

**Table S6.** Neoadjuvant Therapy and Histopathological Parameters NCDB.

| Parameter             | Condition | Total       |            | OP Upfront  |            | neoadj. Therapy + OP |            | p                |
|-----------------------|-----------|-------------|------------|-------------|------------|----------------------|------------|------------------|
|                       |           | n or Median | %/Range/SE | n or Median | %/Range/SE | n or Median          | %/Range/SE |                  |
| <b>n</b>              |           | 29081       |            | 24332       |            | 4749                 |            | -                |
| <b>Histopathology</b> |           |             |            |             |            |                      |            |                  |
| <b>T stage</b>        | T0        | 2174        | 7.5%       | 1460        | 6.0%       | 712                  | 15.0%      | <b>&lt;0.001</b> |
|                       | T1        | 1913        | 6.6%       | 1338        | 5.5%       | 565                  | 11.9%      |                  |
|                       | T2        | 3951        | 13.6%      | 3382        | 13.9%      | 570                  | 12.0%      |                  |
|                       | T3        | 20300       | 69.8%      | 17568       | 72.2%      | 2745                 | 57.8%      |                  |
|                       | T4        | 743         | 2.6%       | 584         | 2.4%       | 157                  | 3.3%       |                  |
| <b>N stage</b>        | N0        | 12098       | 41.6%      | 9149        | 37.6%      | 2944                 | 62.0%      | <b>&lt;0.001</b> |
|                       | N+        | 16983       | 58.4%      | 15183       | 62.4%      | 1805                 | 38.0%      |                  |
| <b>R Stage</b>        | R0        | 22916       | 78.8%      | 18882       | 77.6%      | 4022                 | 84.7%      | <b>&lt;0.001</b> |
|                       | R+        | 6165        | 21.2%      | 5450        | 22.4%      | 727                  | 15.3%      |                  |

OP: operation; neoadj.: neoadjuvant.

**Table S7.** Perioperative Therapy Cohorts and Overall Survival GCRG/ADT registry.

| All patients     |                        |                          |       |             |              |
|------------------|------------------------|--------------------------|-------|-------------|--------------|
| Parameter        | Condition              | Median Survival (Months) | HR    | 95%CI       | p Univariate |
| Neoadj. Therapy  | neoadj. Therapy        | 17.8                     | 1.142 | 0.773-1.410 | 0.729        |
|                  | adj. Therapy           | 18.2                     |       |             |              |
| Adjuvant therapy | neoadj. Therapy and OP | 17.8                     |       |             | 0.048        |

|                   |                                         |                          |       |             |              |
|-------------------|-----------------------------------------|--------------------------|-------|-------------|--------------|
| Radiochemotherapy | Neoadj. Therapy and OP and adj. Therapy | 21.3                     | 0.829 | 0.622-0.987 | 0.702        |
|                   | Neoadj. Chemotherapy                    | 18.3                     |       |             |              |
|                   | Neoadj. Radiochemotherapy               | 17.8                     | 1.125 | 0.837-1.595 |              |
| Stage IA-IIA      |                                         |                          |       |             |              |
| Parameter         | Condition                               | Median survival (months) | HR    | 95%CI       | p univariate |
| Neoadj. Therapy   | neoadj. Therapy                         | 23.7                     |       |             |              |
|                   | adj. Therapy                            | 23.0                     | 1.219 | 0.719-2.398 | 0.519        |
| Adjuvant therapy  | neoadj. Therapy and OP                  | 23.7                     |       |             |              |
|                   | Neoadj. Therapy and OP and adj. Therapy | 24.0                     | 1.319 | 0.649-2.198 | 0.349        |
| Radiochemotherapy | Neoadj. Chemotherapy                    | 20.9                     |       |             |              |
|                   | Neoadj. Radiochemotherapy               | 24.2                     | 0.329 | 0.198-1.198 | 0.129        |
| Stage IIB-III     |                                         |                          |       |             |              |
| Parameter         | Condition                               | Median survival (months) | HR    | 95%CI       | p univariate |
| Neoadj. Therapy   | neoadj. Therapy                         | 17.7                     |       |             |              |
|                   | adj. Therapy                            | 18.4                     | 1.139 | 0.759-1.398 | 0.748        |
| Adjuvant therapy  | neoadj. Therapy and OP                  | 17.7                     |       |             |              |
|                   | Neoadj. Therapy and OP and adj. Therapy | 19.9                     | 0.876 | 0.516-0.987 | <b>0.048</b> |
| Radiochemotherapy | Neoadj. Chemotherapy                    | 15.8                     |       |             |              |
|                   | Neoadj. Radiochemotherapy               | 17.1                     | 1.423 | 0.987-2.139 | 0.149        |

OP: operation; neoadj.: neoadjuvant; adj.: adjuvant.

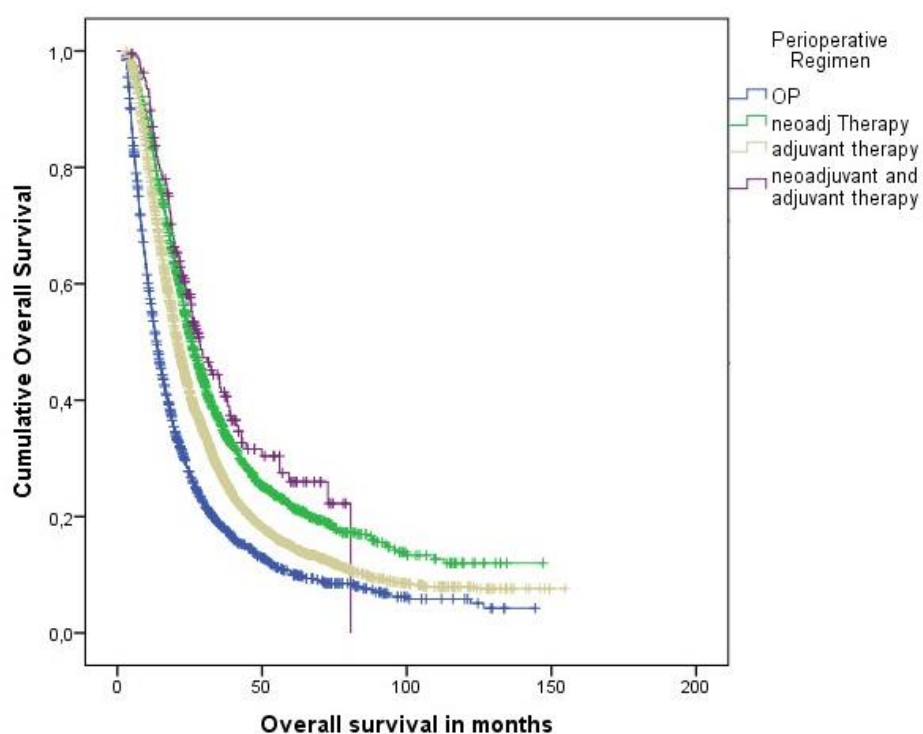

(a)

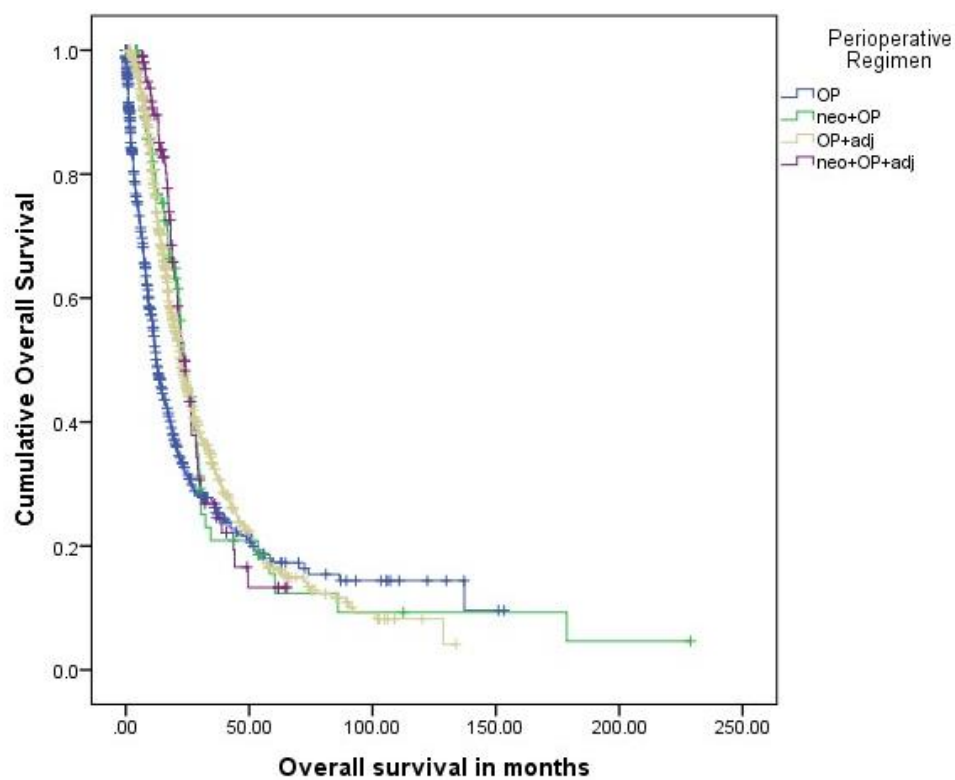

(b)

**Figure S1.** (a) Overall Survival in Perioperative Treatment Regimens in clinical stage IA-IIA PDAC (GCRG/ADT Registry), (b) Overall Survival in Perioperative Treatment Regimens in clinical stage IIB-III PDAC (GCRG/ADT Registry). OP: operation; neoadj.: neoadjuvant; adj.: adjuvant.
